# Supplementary material
Source: Springer Nature journal article supplement (https://www.springermedizin.de/resource/supplementary/12933_2005_38_MOESM8_ESM.pdf/9539486)
Supplement: MOESM8 [file 9539486]

# Diabetes a net producer of: [O2'] Due to an uncoupling of the eNOS enzyme

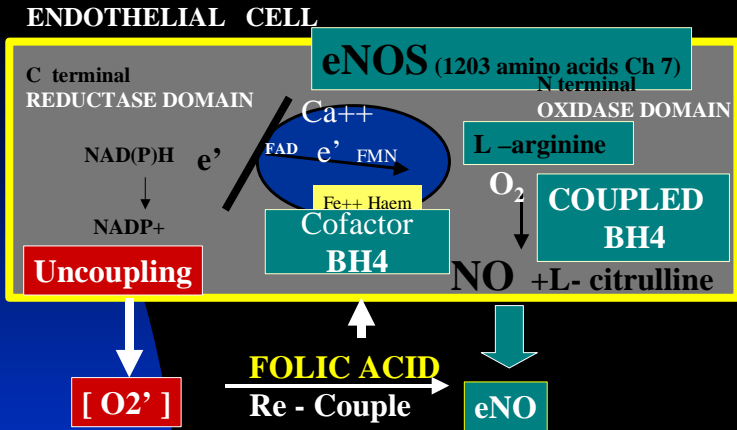

O<sub>2</sub> NAD(P)H

ADMA

(2) **eNOS** Gene Polymorphism or Uncoupling

(1) **L-arginine**

-----→ **NO** + L-citrulline + NADP<sup>+</sup>

(3) **BH4** Oxidative Stress BH<sub>2</sub>, BH<sub>3</sub>
